# Supplementary material for: High oxide-ion conductivity in acceptor-doped Bi-based perovskites at modest doping levels
Source: Royal Society of Chemistry journal article supplement (doi:10.1039/d1cp01120k), 2021-01-01
Supplement: d1cp01120k1.pdf [file d1cp01120k1.pdf]

### Supplementary Information

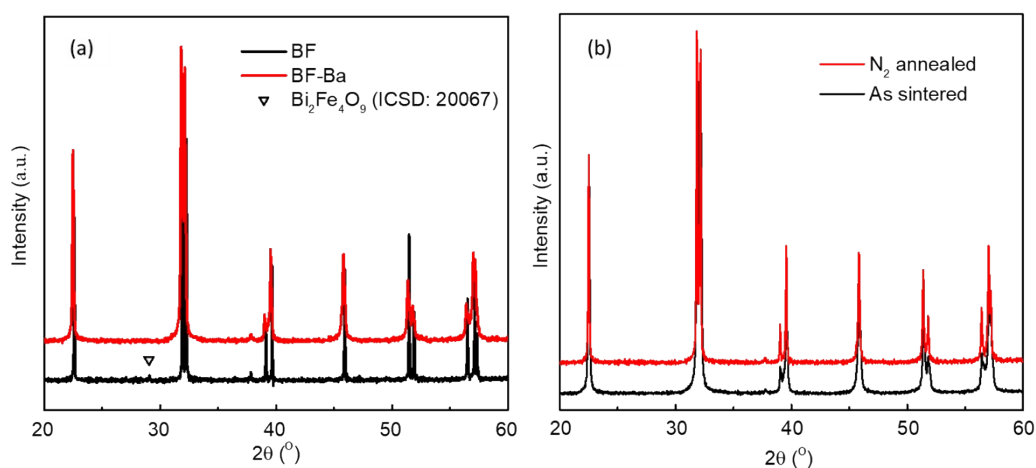

Figure S1. X-ray powder diffraction data for (a) Bi<sub>0.95</sub>Ba<sub>0.05</sub>FeO<sub>2.975</sub> and BiFeO<sub>3</sub> and (b) as sintered and N<sub>2</sub> annealed Bi<sub>0.95</sub>Ba<sub>0.05</sub>FeO<sub>2.975</sub> of crushed ceramics.

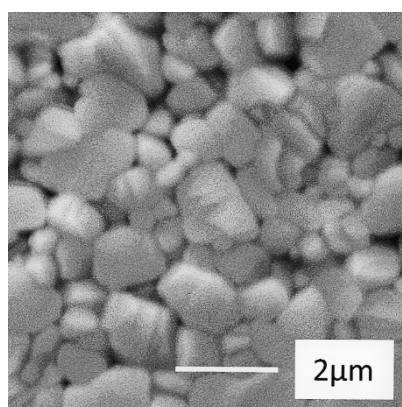

Figure S2. SEM secondary electron images for unpolished surface of Bi<sub>0.95</sub>Ba<sub>0.05</sub>FeO<sub>2.975</sub>.

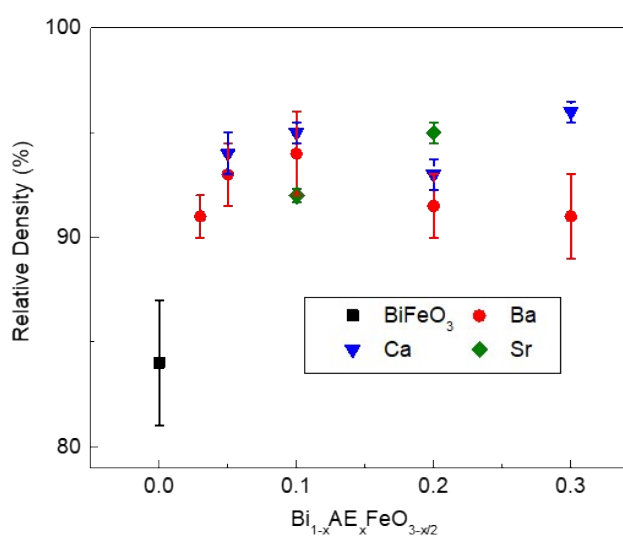

Figure S3. Relative density of BiFeO<sub>3</sub>, Bi<sub>1-x</sub>Ba<sub>x</sub>FeO<sub>3-x/2</sub>, Bi<sub>1-x</sub>Sr<sub>x</sub>FeO<sub>3-x/2</sub> and Bi<sub>1-x</sub>Ca<sub>x</sub>FeO<sub>3-x/2</sub> ceramics.
